# Supplementary material for: Hybrids as mirrors of the past: genomic footprints reveal spatio-temporal dynamics and extinction risk of alpine extremophytes in the mountains of Central Asia
Source: Front Plant Sci. 2024 Apr 17;15:1369732. doi: 10.3389/fpls.2024.1369732 (PMC11061500; doi:10.3389/fpls.2024.1369732)
Supplement: Supplementary Table 2 — List of the examined specimens of Puccinellia with the information on the sampled localities and GenBank accession numbers for chloroplast markers. [file Table_2.xlsx]

## Sheet: Examined individuals
Supplementary Table 2. Examined specimens of Puccinellia in the Pamir Mountains, Central Asia. Population name and ID were specified only for the genetic samples of P. pamirica and its hybrid P. ×vachanica analyzed in the DIYABC-RF analysis. Geographic and genetic group labels were specified for the genetic samples of P. pamirica, P. himalaica and their hybrid P. ×vachanica analyzed in the DIYABC…
Taxon	Country	Population name	Population ID	Geographic group	Genetic group	Sample ID	Maternal ancestry of Puccinellia ×vachanica (chloroplast markers)	Latitude [N]	Longitude [E]	Elevation [m]	Remarks on the spatial coordinates	Voucher specimen (herbarium) / other source	Year [year-month-day]	Collector / Observer	Remarks	DArTseq genetic analyses - dataset of 160 individuals	DArTseq genetic analyses - dataset of 100 individuals	rpoB-trnC intergenic spacer - GenBank Accession Number	rpl16 intron - GenBank Accession Number
Puccinellia ×vachanica	Tajikistan	Murghab	24	North	HYBN	1033_1	P. himalaica	38.123416	73.910169	3584	field record	KRA	2018-07-12	Nobis M., Klichowska E., Wróbel A., Nowak A.		YES	YES	PP457879	PP457811
Puccinellia ×vachanica	Tajikistan	Alichur Valley	22	South	HYBS	1403_9	P. himalaica	37.796183	73.42883	3905	field record	KRA	2019-07-28	Klichowska E., Wróbel A.		YES	YES	PP457896	PP457808
Puccinellia ×vachanica	Tajikistan	Pamir River 1	11	South	HYBS	1405_8	P. himalaica	37.310664	73.046581	3704	field record	KRA	2019-07-29	Klichowska E., Wróbel A.		YES	YES	PP457898	PP457810
Puccinellia ×vachanica	Tajikistan	Pamir River	10	South	HYBS	1406_12	n/a	37.298612	72.981809	3646	field record	KRA	2019-07-29	Klichowska E., Wróbel A.		YES	YES
Puccinellia ×vachanica	Tajikistan	Bulunkul 1	15	South	HYBS	A147	P. himalaica	37.707863	72.9680489999999	3743	field record	KRA	2018-07-10	Nobis M., Klichowska E., Wróbel A., Nowak A.		YES	YES	PP457928	PP457821
Puccinellia ×vachanica	Tajikistan	Sasyk-kul 1	19	South	HYBS	P057	P. himalaica	37.678705	73.171142	3830	field record	KRA	2018-07-10	Nobis M., Klichowska E., Wróbel A., Nowak A.		YES	YES	PP457947	PP457818
Puccinellia himalaica	Tajikistan	Western Pshart River valley	NA	North	HIM	P042	NA	38.291544	73.609533	3990	approximated based on the locality description	LE	1958-07-16	Tzvelev N.		YES	YES	PP457941	PP457848
Puccinellia ×vachanica	Tajikistan	Karabumier	14	South	HYBS	1395_1	P. pamirica	37.546087	72.961543	4001	field record	KRA	2019-07-27	Klichowska E., Wróbel A.		YES	YES	PP457888	PP457814
Puccinellia pamirica	Tajikistan	Karabumier	14	South	PAMS	1395_2	NA	37.546087	72.961543	4001	field record	KRA	2019-07-27	Klichowska E., Wróbel A.		YES	YES
Puccinellia pamirica	Tajikistan	Karabumier	14	South	PAMS	1395_3	NA	37.546087	72.961543	4001	field record	KRA	2019-07-27	Klichowska E., Wróbel A.		YES
Puccinellia pamirica	Tajikistan	Karabumier	14	South	PAMS	1395_4	NA	37.546087	72.961543	4001	field record	KRA	2019-07-27	Klichowska E., Wróbel A.		YES		PP457889	PP457832
Puccinellia pamirica	Tajikistan	Karabumier	14	South	PAMS	1395_5	NA	37.546087	72.961543	4001	field record	KRA	2019-07-27	Klichowska E., Wróbel A.		YES
Puccinellia pamirica	Tajikistan	Karabumier	14	South	PAMS	1395_7	NA	37.546087	72.961543	4001	field record	KRA	2019-07-27	Klichowska E., Wróbel A.		YES
Puccinellia pamirica	Tajikistan	Rangkul	28	North	PAMN	1399_2	NA	38.461264	74.232294	3791	field record	KRA	2019-07-28	Klichowska E., Wróbel A.		YES	YES
Puccinellia ×vachanica	Tajikistan	Rangkul	28	North	HYBN	1399_4	P. pamirica	38.461264	74.232294	3791	field record	KRA	2019-07-28	Klichowska E., Wróbel A.		YES	YES	PP457892	PP457828
Puccinellia pamirica	Tajikistan	Rangkul	28	North	PAMN	1399_6	NA	38.461264	74.232294	3791	field record	KRA	2019-07-28	Klichowska E., Wróbel A.		YES
Puccinellia pamirica	Tajikistan	Rangkul	28	North	PAMN	1399_7	NA	38.461264	74.232294	3791	field record	KRA	2019-07-28	Klichowska E., Wróbel A.		YES
Puccinellia pamirica	Tajikistan	Rangkul	28	North	PAMN	1399_8	NA	38.461264	74.232294	3791	field record	KRA	2019-07-28	Klichowska E., Wróbel A.		YES
Puccinellia pamirica	Tajikistan	Shorkul	27	North	PAMN	1400_1	NA	38.454674	74.198826	3797	field record	KRA	2019-07-28	Klichowska E., Wróbel A.		YES
Puccinellia pamirica	Tajikistan	Shorkul	27	North	PAMN	1400_2	NA	38.454674	74.198826	3797	field record	KRA	2019-07-28	Klichowska E., Wróbel A.		YES
Puccinellia pamirica	Tajikistan	Shorkul	27	North	PAMN	1400_4	NA	38.454674	74.198826	3797	field record	KRA	2019-07-28	Klichowska E., Wróbel A.		YES	YES
Puccinellia pamirica	Tajikistan	Shorkul	27	North	PAMN	1400_5	NA	38.454674	74.198826	3797	field record	KRA	2019-07-28	Klichowska E., Wróbel A.		YES
Puccinellia pamirica	Tajikistan	Shorkul	27	North	PAMN	1400_8	NA	38.454674	74.198826	3797	field record	KRA	2019-07-28	Klichowska E., Wróbel A.		YES
Puccinellia pamirica	Tajikistan	Alichur Valley	22	South	PAMS	1403_2	NA	37.796183	73.42883	3905	field record	KRA	2019-07-28	Klichowska E., Wróbel A.		YES	YES
Puccinellia pamirica	Tajikistan	Alichur Valley	22	South	PAMS	1403_4	NA	37.796183	73.42883	3905	field record	KRA	2019-07-28	Klichowska E., Wróbel A.		YES		PP457895	PP457833
Puccinellia pamirica	Tajikistan	Alichur Valley	22	South	PAMS	1403_5	NA	37.796183	73.42883	3905	field record	KRA	2019-07-28	Klichowska E., Wróbel A.		YES
Puccinellia pamirica	Tajikistan	Alichur Valley	22	South	PAMS	1403_6	NA	37.796183	73.42883	3905	field record	KRA	2019-07-28	Klichowska E., Wróbel A.		YES
Puccinellia pamirica	Tajikistan	Alichur Valley	22	South	PAMS	1403_7	NA	37.796183	73.42883	3905	field record	KRA	2019-07-28	Klichowska E., Wróbel A.		YES
Puccinellia ×vachanica	Tajikistan	Alichur Valley 1	21	South	HYBS	1404_1	n/a	37.792513	73.387539	3897	field record	KRA	2019-07-28	Klichowska E., Wróbel A.		YES	YES
Puccinellia pamirica	Tajikistan	Alichur Valley 1	21	South	PAMS	1404_2	NA	37.792513	73.387539	3897	field record	KRA	2019-07-28	Klichowska E., Wróbel A.		YES	YES
Puccinellia pamirica	Tajikistan	Alichur Valley 1	21	South	PAMS	1404_5	NA	37.792513	73.387539	3897	field record	KRA	2019-07-28	Klichowska E., Wróbel A.		YES
Puccinellia pamirica	Tajikistan	Alichur Valley 1	21	South	PAMS	1404_6	NA	37.792513	73.387539	3897	field record	KRA	2019-07-28	Klichowska E., Wróbel A.		YES
Puccinellia pamirica	Tajikistan	Pamir River 1	11	South	PAMS	1405_5	NA	37.310664	73.046581	3704	field record	KRA	2019-07-29	Klichowska E., Wróbel A.		YES	YES
Puccinellia pamirica	Tajikistan	Pamir River	10	South	PAMS	1406_3	NA	37.298612	72.981809	3646	field record	KRA	2019-07-29	Klichowska E., Wróbel A.		YES
Puccinellia pamirica	Tajikistan	Pamir River	10	South	PAMS	1406_4	NA	37.298612	72.981809	3646	field record	KRA	2019-07-29	Klichowska E., Wróbel A.		YES		PP457900	PP457831
Puccinellia pamirica	Tajikistan	Pamir River	10	South	PAMS	1406_5	NA	37.298612	72.981809	3646	field record	KRA	2019-07-29	Klichowska E., Wróbel A.		YES
Puccinellia pamirica	Tajikistan	Pamir River	10	South	PAMS	1406_6	NA	37.298612	72.981809	3646	field record	KRA	2019-07-29	Klichowska E., Wróbel A.		YES	YES
Puccinellia pamirica	Tajikistan	Pamir River	10	South	PAMS	1406_7	NA	37.298612	72.981809	3646	field record	KRA	2019-07-29	Klichowska E., Wróbel A.		YES
Puccinellia pamirica	Tajikistan	Langar	7	South	PAMS	1411_3	NA	37.033416	72.636052	2798	field record	KRA	2019-07-30	Klichowska E., Wróbel A.		YES	YES
Puccinellia pamirica	Tajikistan	Langar	7	South	PAMS	1411_4	NA	37.033416	72.636052	2798	field record	KRA	2019-07-30	Klichowska E., Wróbel A.		YES		PP457904	PP457829
Puccinellia ×vachanica	Tajikistan	Karakul 2	31	North	HYBN	A041	n/a	39.070359	73.59144	3941	field record	KRA	2018-07-09	Nobis M., Klichowska E., Wróbel A., Nowak A.		YES	YES
Puccinellia ×vachanica	Tajikistan	Karakul 2	31	North	HYBN	A042	P. himalaica	39.070359	73.59144	3941	field record	KRA	2018-07-09	Nobis M., Klichowska E., Wróbel A., Nowak A.		YES	YES	PP457919	PP457817
Puccinellia ×vachanica	Tajikistan	Karakul 2	31	North	HYBN	A043	n/a	39.070359	73.59144	3941	field record	KRA	2018-07-09	Nobis M., Klichowska E., Wróbel A., Nowak A.		YES	YES
Puccinellia ×vachanica	Tajikistan	Karakul 2	31	North	HYBN	A047	n/a	39.070359	73.59144	3941	field record	KRA	2018-07-09	Nobis M., Klichowska E., Wróbel A., Nowak A.		YES	YES
Puccinellia pamirica	Tajikistan	Markansu	32	North	PAMN	A061	NA	39.315549	73.334025	3990	field record	KRA	2018-07-09	Nobis M., Klichowska E., Wróbel A., Nowak A.		YES	YES
Puccinellia pamirica	Tajikistan	Markansu	32	North	PAMN	A064	NA	39.315549	73.334025	3990	field record	KRA	2018-07-09	Nobis M., Klichowska E., Wróbel A., Nowak A.		YES
Puccinellia pamirica	Tajikistan	Markansu	32	North	PAMN	A065	NA	39.315549	73.334025	3990	field record	KRA	2018-07-09	Nobis M., Klichowska E., Wróbel A., Nowak A.		YES
Puccinellia pamirica	Tajikistan	Karakul 1	30	North	PAMN	A067	NA	38.982873	73.542946	3925	field record	KRA	2018-07-09	Nobis M., Klichowska E., Wróbel A., Nowak A.		YES
Puccinellia pamirica	Tajikistan	Karakul 1	30	North	PAMN	A068	NA	38.982873	73.542946	3925	field record	KRA	2018-07-09	Nobis M., Klichowska E., Wróbel A., Nowak A.		YES
Puccinellia pamirica	Tajikistan	Akbaital Valley	25	North	PAMN	A074	NA	38.538325	73.802575	4134	field record	KRA	2018-07-09	Nobis M., Klichowska E., Wróbel A., Nowak A.		YES	YES
Puccinellia ×vachanica	Tajikistan	Akbaital Valley	25	North	HYBN	A075	n/a	38.538325	73.802575	4134	field record	KRA	2018-07-09	Nobis M., Klichowska E., Wróbel A., Nowak A.		YES	YES
Puccinellia ×vachanica	Tajikistan	Sasyk-kul	20	South	HYBS	A100	n/a	37.685818	73.202406	3841	field record	KRA	2018-07-10	Nobis M., Klichowska E., Wróbel A., Nowak A.		YES	YES
Puccinellia pamirica	Tajikistan	Sasyk-kul	20	South	PAMS	A105	NA	37.685818	73.202406	3841	field record	KRA	2018-07-10	Nobis M., Klichowska E., Wróbel A., Nowak A.		YES		PP457924	PP457836
Puccinellia pamirica	Tajikistan	Sasyk-kul	20	South	PAMS	A116	NA	37.685818	73.202406	3841	field record	KRA	2018-07-10	Nobis M., Klichowska E., Wróbel A., Nowak A.		YES
Puccinellia ×vachanica	Tajikistan	Sasyk-kul	20	South	HYBS	A120	n/a	37.685818	73.202406	3841	field record	KRA	2018-07-10	Nobis M., Klichowska E., Wróbel A., Nowak A.		YES	YES
Puccinellia pamirica	Tajikistan	Sasyk-kul	20	South	PAMS	A121	NA	37.685818	73.202406	3841	field record	KRA	2018-07-10	Nobis M., Klichowska E., Wróbel A., Nowak A.		YES	YES
Puccinellia pamirica	Tajikistan	Sasyk-kul 1	19	South	PAMS	A123	NA	37.678705	73.171142	3830	field record	KRA	2018-07-10	Nobis M., Klichowska E., Wróbel A., Nowak A.		YES	YES
Puccinellia pamirica	Tajikistan	Sasyk-kul 1	19	South	PAMS	A125	NA	37.678705	73.171142	3830	field record	KRA	2018-07-10	Nobis M., Klichowska E., Wróbel A., Nowak A.		YES
Puccinellia pamirica	Tajikistan	Sasyk-kul 1	19	South	PAMS	A126	NA	37.678705	73.171142	3830	field record	KRA	2018-07-10	Nobis M., Klichowska E., Wróbel A., Nowak A.		YES
Puccinellia pamirica	Tajikistan	Sasyk-kul 1	19	South	PAMS	A127	NA	37.678705	73.171142	3830	field record	KRA	2018-07-10	Nobis M., Klichowska E., Wróbel A., Nowak A.		YES
Puccinellia pamirica	Tajikistan	Sasyk-kul 1	19	South	PAMS	A134	NA	37.678705	73.171142	3830	field record	KRA	2018-07-10	Nobis M., Klichowska E., Wróbel A., Nowak A.		YES
Puccinellia pamirica	Tajikistan	Sasyk-kul 1	19	South	PAMS	A142	NA	37.678705	73.171142	3830	field record	KRA	2018-07-10	Nobis M., Klichowska E., Wróbel A., Nowak A.		YES		PP457927	PP457834
Puccinellia pamirica	Tajikistan	Bulunkul	16	South	PAMS	A154	NA	37.702899	72.974361	3749	field record	KRA	2018-07-10	Nobis M., Klichowska E., Wróbel A., Nowak A.		YES
Puccinellia pamirica	Tajikistan	Bulunkul	16	South	PAMS	A156	NA	37.702899	72.974361	3749	field record	KRA	2018-07-10	Nobis M., Klichowska E., Wróbel A., Nowak A.		YES	YES	PP457929	PP457835
Puccinellia pamirica	Tajikistan	Bulunkul	16	South	PAMS	A157	NA	37.702899	72.974361	3749	field record	KRA	2018-07-10	Nobis M., Klichowska E., Wróbel A., Nowak A.		YES
Puccinellia pamirica	Tajikistan	Bulunkul	16	South	PAMS	A158	NA	37.702899	72.974361	3749	field record	KRA	2018-07-10	Nobis M., Klichowska E., Wróbel A., Nowak A.		YES
Puccinellia pamirica	Tajikistan	Bulunkul	16	South	PAMS	A161	NA	37.702899	72.974361	3749	field record	KRA	2018-07-10	Nobis M., Klichowska E., Wróbel A., Nowak A.		YES
Puccinellia pamirica	Tajikistan	Bulunkul	16	South	PAMS	A162	NA	37.702899	72.974361	3749	field record	KRA	2018-07-10	Nobis M., Klichowska E., Wróbel A., Nowak A.		YES
Puccinellia pamirica	Tajikistan	Bulunkul	16	South	PAMS	A163	NA	37.702899	72.974361	3749	field record	KRA	2018-07-10	Nobis M., Klichowska E., Wróbel A., Nowak A.		YES
Puccinellia pamirica	Tajikistan	Chukurkul	18	South	PAMS	A180	NA	37.591108	73.092462	3911	field record	KRA	2018-07-11	Nobis M., Klichowska E., Wróbel A., Nowak A.		YES
Puccinellia pamirica	Tajikistan	Chukurkul	18	South	PAMS	A183	NA	37.591108	73.092462	3911	field record	KRA	2018-07-11	Nobis M., Klichowska E., Wróbel A., Nowak A.		YES
Puccinellia pamirica	Tajikistan	Chukurkul	18	South	PAMS	A185	NA	37.591108	73.092462	3911	field record	KRA	2018-07-11	Nobis M., Klichowska E., Wróbel A., Nowak A.		YES	YES
Puccinellia pamirica	Tajikistan	Chukurkul	18	South	PAMS	A186	NA	37.591108	73.092462	3911	field record	KRA	2018-07-11	Nobis M., Klichowska E., Wróbel A., Nowak A.		YES		PP457930	PP457837
Puccinellia pamirica	Tajikistan	Chukurkul	18	South	PAMS	A187	NA	37.591108	73.092462	3911	field record	KRA	2018-07-11	Nobis M., Klichowska E., Wróbel A., Nowak A.		YES
Puccinellia pamirica	Tajikistan	Chukurkul	18	South	PAMS	A188	NA	37.591108	73.092462	3911	field record	KRA	2018-07-11	Nobis M., Klichowska E., Wróbel A., Nowak A.		YES
Puccinellia pamirica	Tajikistan	Chukurkul	18	South	PAMS	A190	NA	37.591108	73.092462	3911	field record	KRA	2018-07-11	Nobis M., Klichowska E., Wróbel A., Nowak A.		YES
Puccinellia pamirica	Tajikistan	Khargush	12	South	PAMS	A194_1	NA	37.421801	73.082972	4197	field record	KRA	2018-07-11	Nobis M., Klichowska E., Wróbel A., Nowak A.		YES	YES
Puccinellia ×vachanica	Tajikistan	Chukurkul 1	17	South	HYBS	A201	n/a	37.551012	73.108364	3956	field record	KRA	2018-07-11	Nobis M., Klichowska E., Wróbel A., Nowak A.		YES	YES
Puccinellia pamirica	Tajikistan	Chukurkul 1	17	South	PAMS	A208	NA	37.551012	73.108364	3956	field record	KRA	2018-07-11	Nobis M., Klichowska E., Wróbel A., Nowak A.		YES	YES
Puccinellia pamirica	Tajikistan	Karabumier 1	13	South	PAMS	A219	NA	37.522421	72.855501	4116	field record	KRA	2018-07-11	Nobis M., Klichowska E., Wróbel A., Nowak A.		YES	YES
Puccinellia pamirica	Tajikistan	Karabumier 1	13	South	PAMS	A220	NA	37.522421	72.855501	4116	field record	KRA	2018-07-11	Nobis M., Klichowska E., Wróbel A., Nowak A.		YES
Puccinellia pamirica	Tajikistan	Karabumier 1	13	South	PAMS	A221	NA	37.522421	72.855501	4116	field record	KRA	2018-07-11	Nobis M., Klichowska E., Wróbel A., Nowak A.		YES
Puccinellia pamirica	Tajikistan	Karakul	29	North	PAMN	A235	NA	38.955043	73.512626	3925	field record	KRA	2018-07-12	Nobis M., Klichowska E., Wróbel A., Nowak A.		YES
Puccinellia pamirica	Tajikistan	Karakul	29	North	PAMN	A237	NA	38.955043	73.512626	3925	field record	KRA	2018-07-12	Nobis M., Klichowska E., Wróbel A., Nowak A.		YES
Puccinellia pamirica	Tajikistan	Karakul	29	North	PAMN	A239	NA	38.955043	73.512626	3925	field record	KRA	2018-07-12	Nobis M., Klichowska E., Wróbel A., Nowak A.		YES		PP457933	PP457840
Puccinellia pamirica	Tajikistan	Karakul	29	North	PAMN	A242	NA	38.955043	73.512626	3925	field record	KRA	2018-07-12	Nobis M., Klichowska E., Wróbel A., Nowak A.		YES
Puccinellia pamirica	Tajikistan	Karakul	29	North	PAMN	A243	NA	38.955043	73.512626	3925	field record	KRA	2018-07-12	Nobis M., Klichowska E., Wróbel A., Nowak A.		YES	YES
Puccinellia pamirica	Tajikistan	Karakul	29	North	PAMN	A244	NA	38.955043	73.512626	3925	field record	KRA	2018-07-12	Nobis M., Klichowska E., Wróbel A., Nowak A.		YES
Puccinellia pamirica	Tajikistan	Murghab	24	North	PAMN	A249	NA	38.123416	73.910169	3584	field record	KRA	2018-07-12	Nobis M., Klichowska E., Wróbel A., Nowak A.		YES	YES
Puccinellia ×vachanica	Tajikistan	Karakul	29	North	HYBN	A259	n/a	38.955043	73.512626	3925	field record	KRA	2018-07-12	Nobis M., Klichowska E., Wróbel A., Nowak A.		YES	YES
Puccinellia pamirica	Tajikistan	KGZ-TJK border	33	North	PAMN	P030	NA	39.396122	73.299736	4029	field record	KRA	2016-07-25	Nobis M., Nobis A.		YES	YES
Puccinellia pamirica	Tajikistan	KGZ-TJK border	33	North	PAMN	P031	NA	39.396122	73.299736	4029	field record	KRA	2016-07-25	Nobis M., Nobis A.		YES		PP457938	PP457838
Puccinellia pamirica	Tajikistan	Markansu	32	North	PAMN	P053	NA	39.315549	73.334025	3990	field record	KRA	2018-07-09	Nobis M., Klichowska E., Wróbel A., Nowak A.		YES
Puccinellia pamirica	Tajikistan	Markansu	32	North	PAMN	P054	NA	39.315549	73.334025	3990	field record	KRA	2018-07-09	Nobis M., Klichowska E., Wróbel A., Nowak A.		YES
Puccinellia pamirica	Tajikistan	Markansu	32	North	PAMN	P055	NA	39.315549	73.334025	3990	field record	KRA	2018-07-09	Nobis M., Klichowska E., Wróbel A., Nowak A.		YES
Puccinellia pamirica	Tajikistan	Karakul 1	30	North	PAMN	P056	NA	38.982873	73.542946	3925	field record	KRA	2018-07-09	Nobis M., Klichowska E., Wróbel A., Nowak A.		YES		PP457946	PP457839
Puccinellia pamirica	Tajikistan	Karakul 1	30	North	PAMN	P061	NA	38.982873	73.542946	3925	field record	KRA	2018-07-09	Nobis M., Klichowska E., Wróbel A., Nowak A.		YES	YES
Puccinellia ×vachanica	Tajikistan	Murghab	24	North	HYBN	1033_6	P. himalaica	38.123416	73.910169	3584	field record	KRA	2018-07-12	Nobis M., Klichowska E., Wróbel A., Nowak A.		YES	YES	PP457880	PP457813
Puccinellia pamirica	Tajikistan	Alichur Valley 1	21	South	PAMS	1404_3	NA	37.792513	73.387539	3897	field record	KRA	2019-07-28	Klichowska E., Wróbel A.		YES
Puccinellia pamirica	Tajikistan	Langar	7	South	PAMS	1411_8	NA	37.033416	72.636052	2798	field record	KRA	2019-07-30	Klichowska E., Wróbel A.		YES		PP457905	PP457830
Puccinellia ×vachanica	Tajikistan	Sasyk-kul 1	19	South	HYBS	A138	P. himalaica	37.678705	73.171142	3830	field record	KRA	2018-07-10	Nobis M., Klichowska E., Wróbel A., Nowak A.		YES	YES	PP457926	PP457819
Puccinellia ×vachanica	Tajikistan	Bulunkul 1	15	South	HYBS	A150	n/a	37.707863	72.9680489999999	3743	field record	KRA	2018-07-10	Nobis M., Klichowska E., Wróbel A., Nowak A.		YES	YES
Puccinellia ×vachanica	Tajikistan	Shorkul 1	26	North	HYBN	785_1	P. himalaica	38.439436	74.142561	3790	field record	KRA	2016-07-25	Nobis M., Nobis A.		YES	YES	PP457911	PP457827
Puccinellia pamirica	Tajikistan	Shorkul 1	26	North	PAMN	785_6	NA	38.439436	74.142561	3790	field record	KRA	2016-07-25	Nobis M., Nobis A.		YES
Puccinellia ×vachanica	Tajikistan	Pamir River 1	11	South	HYBS	1405_6	n/a	37.310664	73.046581	3704	field record	KRA	2019-07-29	Klichowska E., Wróbel A.		YES	YES
Puccinellia ×vachanica	Tajikistan	Pamir River	10	South	HYBS	1406_2	P. himalaica	37.298612	72.981809	3646	field record	KRA	2019-07-29	Klichowska E., Wróbel A.		YES	YES	PP457899	PP457824
Puccinellia ×vachanica	Tajikistan	Chukurkul 1	17	South	HYBS	A205	P. himalaica	37.551012	73.108364	3956	field record	KRA	2018-07-11	Nobis M., Klichowska E., Wróbel A., Nowak A.		YES	YES	PP457932	PP457820
Puccinellia ×vachanica	Tajikistan	Alichur Valley 2	23	South	HYBS	1402_1	P. himalaica	37.819782	73.559108	3940	field record	KRA	2019-07-28	Klichowska E., Wróbel A.		YES	YES	PP457894	PP457807
Puccinellia ×vachanica	Tajikistan	Pamir River 2	9	South	HYBS	1408_3	n/a	37.236742	72.870706	3521	field record	KRA	2019-07-29	Klichowska E., Wróbel A.		YES	YES
Puccinellia ×vachanica	Tajikistan	Langar	7	South	HYBS	1411_1	P. himalaica	37.033416	72.636052	2798	field record	KRA	2019-07-30	Klichowska E., Wróbel A.		YES	YES	PP457903	PP457822
Puccinellia ×vachanica	Tajikistan	Panj River 1	6	South	HYBS	1413_7	P. himalaica	37.00449	72.551541	2810	field record	KRA	2019-07-30	Klichowska E., Wróbel A.		YES	YES	PP457906	PP457815
Puccinellia ×vachanica	Tajikistan	Panj River 2	5	South	HYBS	1414_6	P. himalaica	37.006596	72.513146	2779	field record	KRA	2019-07-30	Klichowska E., Wróbel A.		YES	YES	PP457907	PP457816
Puccinellia ×vachanica	Tajikistan	Panj River 3	4	South	HYBS	1415_2	P. himalaica	37.008881	72.426484	2773	field record	KRA	2019-07-30	Klichowska E., Wróbel A.		YES	YES	PP457908	PP457823
Puccinellia ×vachanica	Tajikistan	Panj River 5	2	South	HYBS	1417_1	n/a	36.788383	71.989823	2700	field record	KRA	2019-07-30	Klichowska E., Wróbel A.		YES	YES
Puccinellia ×vachanica	Tajikistan	Panj River 6	1	South	HYBS	1418_7	P. himalaica	36.911122	71.507343	2437	field record	KRA	2019-07-30	Klichowska E., Wróbel A.		YES	YES	PP457910	PP457826
Puccinellia ×vachanica	Tajikistan	Jelondy	8	South	HYBS	1390_2	P. himalaica	37.593177	72.557196	3498	field record	KRA	2019-07-26	Klichowska E., Wróbel A.		YES	YES	PP457884	PP457812
Puccinellia ×vachanica	Tajikistan	Pamir River 1	11	South	HYBS	1405_3	P. himalaica	37.310664	73.046581	3704	field record	KRA	2019-07-29	Klichowska E., Wróbel A.		YES	YES	PP457897	PP457809
Puccinellia ×vachanica	Tajikistan	Panj River 4	3	South	HYBS	1416_2	P. himalaica	36.933587	72.212619	2750	field record	KRA	2019-07-30	Klichowska E., Wróbel A.		YES	YES	PP457909	PP457825
Puccinellia pamirica	Tajikistan	Pamir River 3	NA	South	PAMS	NA	NA	37.463389	73.303517	3952	field record	KRA	2023-07-24	Nobis M., Klichowska E.
Puccinellia pamirica	Tajikistan	Pamir River 4	NA	South	PAMS	NA	NA	37.413306	73.224806	3923	field record	KRA	2023-07-24	Nobis M., Klichowska E.
Puccinellia ×vachanica	Tajikistan	Pamir River 4	NA	South	HYBS	NA	n/a	37.413306	73.224806	3923	field record	KRA	2023-07-24	Nobis M., Klichowska E.
Puccinellia distans agg.	Slovakia	NA	NA	NA	NA	P065	NA	49.369343	20.537287	648	field record	KRA	2020-08-02	Wróbel A.		YES	YES	PP457950	PP457856
Puccinellia distans agg.	Kyrgyzstan	NA	NA	NA	NA	A265	NA	39.893817	73.422708	2352	field record	KRA	2018-07-13	Nobis M., Klichowska E., Wróbel A., Nowak A.		YES	YES	PP457937	PP457858
Puccinellia distans agg.	Tajikistan	NA	NA	NA	NA	1320_2	NA	39.650678	68.699287	2041	field record	KRA	2019-06-17	Nobis M., Zalewska-Gałosz J., Klichowska E., Wróbel A.		YES	YES	PP457882	PP457863
Puccinellia distans agg.	Kyrgyzstan	NA	NA	NA	NA	A005	NA	42.246608	76.709917	1607	field record	KRA	2018-07-04	Nobis M., Klichowska E., Wróbel A., Nowak A.		YES	YES	PP457913	PP457850
Puccinellia distans agg.	Kyrgyzstan	NA	NA	NA	NA	A031	NA	41.181853	75.721751	2041	field record	KRA	2018-07-06	Nobis M., Klichowska E., Wróbel A., Nowak A.		YES	YES	PP457918	PP457852
Puccinellia distans agg.	Kyrgyzstan	NA	NA	NA	NA	A263	NA	39.690195	73.124981	3061	field record	KRA	2018-07-13	Nobis M., Klichowska E., Wróbel A., Nowak A.		YES	YES	PP457936	PP457857
Puccinellia hackeliana	Tajikistan	NA	NA	NA	NA	1394_4	NA	37.530532	72.884889	4101	field record	KRA	2019-07-27	Klichowska E., Wróbel A.		YES	YES	PP457887	PP457865
Puccinellia hackeliana	Tajikistan	NA	NA	NA	NA	1395_9	NA	37.546087	72.961543	4001	field record	KRA	2019-07-27	Klichowska E., Wróbel A.		YES	YES	PP457890	PP457859
Puccinellia hackeliana	Tajikistan	NA	NA	NA	NA	1408_2	NA	37.236742	72.870706	3521	field record	KRA	2019-07-29	Klichowska E., Wróbel A.		YES	YES	PP457901	PP457854
Puccinellia distans agg.	Tajikistan	NA	NA	NA	NA	A071	NA	38.56547	73.717097	4261	field record	KRA	2018-07-09	Nobis M., Klichowska E., Wróbel A., Nowak A.		YES	YES	PP457922	PP457853
Puccinellia distans agg.	Tajikistan	NA	NA	NA	NA	1398_1	NA	38.434175	74.1108239999999	3794	field record	KRA	2019-07-28	Klichowska E., Wróbel A.		YES	YES	PP457891	PP457860
Puccinellia distans agg.	Tajikistan	NA	NA	NA	NA	1398_2	NA	38.434175	74.1108239999999	3794	field record	KRA	2019-07-28	Klichowska E., Wróbel A.		YES	YES
Puccinellia distans agg.	Tajikistan	NA	NA	NA	NA	1400_6	NA	38.454674	74.198826	3797	field record	KRA	2019-07-28	Klichowska E., Wróbel A.		YES	YES	PP457893	PP457861
Puccinellia distans agg.	Tajikistan	NA	NA	NA	NA	1390_1	NA	37.593177	72.557196	3498	field record	KRA	2019-07-26	Klichowska E., Wróbel A.		YES	YES	PP457883	PP457864
Puccinellia distans agg.	Tajikistan	NA	NA	NA	NA	1408_4	NA	37.236742	72.870706	3521	field record	KRA	2019-07-29	Klichowska E., Wróbel A.		YES	YES	PP457902	PP457855
Puccinellia distans agg.	Tajikistan	NA	NA	NA	NA	1413_1	NA	37.00449	72.551541	2810	field record	KRA	2019-07-30	Klichowska E., Wróbel A.		YES	YES
Puccinellia distans agg.	Kyrgyzstan	NA	NA	NA	NA	A004	NA	42.246608	76.709917	1607	field record	KRA	2018-07-04	Nobis M., Klichowska E., Wróbel A., Nowak A.		YES	YES	PP457912	PP457849
Puccinellia distans agg.	Kyrgyzstan	NA	NA	NA	NA	A016	NA	41.847869	76.452387	3249	field record	KRA	2018-07-05	Nobis M., Klichowska E., Wróbel A., Nowak A.		YES	YES	PP457915	PP457851
Puccinellia humilis	Tajikistan	NA	NA	NA	NA	1392_1	NA	37.484589	72.774002	4240	field record	KRA	2019-07-27	Klichowska E., Wróbel A.		YES	YES	PP457885	PP457842
Puccinellia humilis	Tajikistan	NA	NA	NA	NA	A060	NA	39.315549	73.334025	3990	field record	KRA	2018-07-09	Nobis M., Klichowska E., Wróbel A., Nowak A.		YES	YES	PP457921	PP457841
Puccinellia humilis	Tajikistan	NA	NA	NA	NA	A108	NA	37.685818	73.202406	3841	field record	KRA	2018-07-10	Nobis M., Klichowska E., Wróbel A., Nowak A.		YES	YES	PP457925	PP457844
Puccinellia humilis	Tajikistan	NA	NA	NA	NA	A258	NA	38.562262	73.564491	4500	field record	KRA	2018-07-12	Nobis M., Klichowska E., Wróbel A., Nowak A.		YES	YES	PP457935	PP457843
Puccinellia pauciramea	Tajikistan	NA	NA	NA	NA	1393_3	NA	37.491103	72.8145739999999	4228	field record	KRA	2019-07-27	Klichowska E., Wróbel A.		YES	YES	PP457886	PP457869
Puccinellia pauciramea	Tajikistan	NA	NA	NA	NA	A058	NA	39.315549	73.334025	3990	field record	KRA	2018-07-09	Nobis M., Klichowska E., Wróbel A., Nowak A.		YES	YES	PP457920	PP457868
Puccinellia pauciramea	Tajikistan	NA	NA	NA	NA	A098	NA	37.685818	73.202406	3841	field record	KRA	2018-07-10	Nobis M., Klichowska E., Wróbel A., Nowak A.		YES	YES	PP457923	PP457867
Puccinellia pauciramea	Tajikistan	NA	NA	NA	NA	A193	NA	37.508802	73.089613	4105	field record	KRA	2018-07-11	Nobis M., Klichowska E., Wróbel A., Nowak A.		YES	YES	PP457931	PP457870
Puccinellia pauciramea	Tajikistan	NA	NA	NA	NA	A257	NA	38.562262	73.564491	4500	field record	KRA	2018-07-12	Nobis M., Klichowska E., Wróbel A., Nowak A.		YES	YES	PP457934	PP457866
Puccinellia pauciramea	Tajikistan	NA	NA	NA	NA	P049	NA	n/a	n/a	3850		LE	1963-08-24	Ikonnikov C.	Pamir, [Чечекты]	YES	YES	PP457945	PP457871
Puccinellia pauciramea	Kyrgyzstan	NA	NA	NA	NA	P063	NA	41.874378	78.006446	3672	field record	KRA	2017-07-05	Nobis M., Klichowska E., Wróbel A., Nowak A.		YES	YES	PP457949	PP457872
Puccinellia schischkinii	Kazakhstan	NA	NA	NA	NA	1215_5	NA	46.35983	78.87311	411	field record	KRA	2019-05-22	M. Nobis, A. Wróbel		YES	YES
Puccinellia schischkinii	Kazakhstan	NA	NA	NA	NA	1239_1	NA	45.061557	78.1301019999999	511	field record	KRA	2019-05-25	M. Nobis, A. Wróbel		YES	YES
Puccinellia schischkinii	Kazakhstan	NA	NA	NA	NA	1258_3	NA	43.452618	78.660773	1112	field record	KRA	2019-05-28	M. Nobis, A. Wróbel		YES	YES	PP457881	PP457862
Puccinellia subspicata	Kyrgyzstan	NA	NA	NA	NA	P045	NA	n/a	n/a	n/a		LE	1952-07-17	Tzvelev N.	Talas Ala Tau	YES	YES	PP457942	PP457845
Puccinellia subspicata	Kyrgyzstan	NA	NA	NA	NA	P046	NA	n/a	n/a	n/a		LE	1952-07-18	Tzvelev N.	Talas Ala Tau	YES	YES	PP457943	PP457846
Puccinellia subspicata	Tajikistan	NA	NA	NA	NA	P048	NA	n/a	n/a	3300		LE	1964-08-25	Tzvelev N.	Peter I Mts	YES	YES	PP457944	PP457847
Puccinellia subspicata	Tajikistan	NA	NA	NA	NA	P051	NA	n/a	n/a	4450		LE	1958-08-28	Tzvelev N.	Badahshan (Wakhan), Pamir, [Бассейн р. Билянд-Киик]	YES	YES
Puccinellia tenuiflora	Russia	NA	NA	NA	NA	P036	NA	n/a	n/a	n/a		LE	1986-07-25	Bubnova S.	Krassnojarsk Province, Chakassia, Schria district, lake Schira	YES	YES	PP457939	PP457877
Puccinellia tenuiflora	Russia	NA	NA	NA	NA	P037	NA	n/a	n/a	n/a		LE	1986-07-08	Bubnova S.	Tuva, district Erzin	YES	YES	PP457940	PP457878
Puccinellia tianschanica	Kyrgyzstan	NA	NA	NA	NA	A011	NA	41.926565	75.7379	2392	field record	KRA	2018-07-05	Nobis M., Klichowska E., Wróbel A., Nowak A.		YES	YES	PP457914	PP457873
Puccinellia tianschanica	Kyrgyzstan	NA	NA	NA	NA	A018	NA	41.76234	76.57441	2923	field record	KRA	2018-07-05	Nobis M., Klichowska E., Wróbel A., Nowak A.		YES	YES	PP457916	PP457874
Puccinellia tianschanica	Kyrgyzstan	NA	NA	NA	NA	A020	NA	41.759172	76.5929139999999	2924	field record	KRA	2018-07-05	Nobis M., Klichowska E., Wróbel A., Nowak A.		YES	YES	PP457917	PP457875
Puccinellia tianschanica	Kyrgyzstan	NA	NA	NA	NA	P059	NA	42.03854	77.005146	2216	field record	KRA	2018-07-03	Nobis M., Klichowska E., Wróbel A., Nowak A.		YES	YES	PP457948	PP457876
Puccinellia himalaica	Tajikistan	NA	NA	NA	NA	NA	NA	38.655412	72.897883	3740	approximated based on the locality description	GBIF 615384444	2002-09-08	Dickoré W.	Uruchbulak - Ailutek Pass, Gudara Mts; original coordinates changed to match a locality description
Puccinellia himalaica	China	NA	NA	NA	NA	NA	NA	38.407961	75.183372	3650	approximated based on the locality description	GBIF 615384009; (Coll. GOET)	1991-07-26	G.&S.Miehe	Mustagh Ata. N; original coordinates changed to match a locality description
Puccinellia himalaica	China	NA	NA	NA	NA	NA	NA	38.814222	75.424492	2115	approximated based on the locality description	GBIF 615383969; (Pl.As.Centr.)	n/a	Junatov	Rd. Kashgar - Taxkorgan. Gez Vy. 60-65 km S Upal
Puccinellia himalaica	Tajikistan	NA	NA	NA	NA	NA	NA	38.48	74.32	3800	approximated based on the locality description	GBIF 615384443	2002-09-12	Dickoré W.	Rangkul lake
Puccinellia pamirica	Afghanistan	NA	NA	NA	NA	NA	NA	37.121886	72.976769	4331	approximated based on the locality description	Anders 8048 as KUFS 008058; mentioned in JACQ - Virtual Herbaria; Dickoré 1995; GBIF 615384592	1970-08-04	Anders O.	Upper Istmoch Valley; [Badakhshan, östlicher Oberlauf des Darya-eIstmoch (Toli Bay Tal), 4000 m, det. Anders, 1970]; voucher not verified by the athours
Puccinellia pamirica	Afghanistan	NA	NA	NA	NA	NA	NA	37.218602	74.138619	4033	approximated based on the locality description	Anders 7446 as KUFS 008059; Podlech & Anders 1977 (with different identification); Dickoré 1995; GBIF 615384527	1970-07-14	Anders O.	Chaqmaqtin; voucher not verified by the athours
Puccinellia pamirica	China	NA	NA	NA	NA	NA	NA	37.784803	75.242833	3068	approximated based on the locality description	Wu & Wang 1999	n/a	n/a	Taxkorgan Xian: Maza
Puccinellia pamirica	Tajikistan	NA	NA	NA	NA	NA	NA	37.459773	73.668955	4124	approximated based on the locality description	Stanyukovich 1949	n/a	n/a	Zorkul
Puccinellia pamirica	Tajikistan	NA	NA	NA	NA	NA	NA	37.491617	74.820831	3849	approximated based on the locality description	Ovchinnikov & Chukavina 1957	n/a	Aleksienko	Kyzyl-Rabat
Puccinellia pamirica	Tajikistan	NA	NA	NA	NA	NA	NA	36.978212	72.310188	2750	approximated based on the locality description	Ovchinnikov & Chukavina 1957	n/a	Ikkonikov C., Afanasiev	Panj River - Vrang
Puccinellia pamirica	Tajikistan	NA	NA	NA	NA	NA	NA	36.946608	72.230192	2792	approximated based on the locality description	Ovchinnikov & Chukavina 1957	n/a	Ikkonikov C., Afanasiev	Panj River - Ptup
Puccinellia pamirica	Tajikistan	NA	NA	NA	NA	NA	NA	36.795899	72.002442	2718	approximated based on the locality description	Ovchinnikov & Chukavina 1957	n/a	Ikkonikov C., Afanasiev	Panj River - Darshai
Puccinellia pamirica	Tajikistan	NA	NA	NA	NA	NA	NA	38.342503	74.016415	3790	approximated based on the locality description	Ovchinnikov & Chukavina 1957	n/a	Stanyukovich	Chechekty
Puccinellia pamirica	Tajikistan	NA	NA	NA	NA	NA	NA	37.795777	73.929512	4169	approximated based on the locality description	Ovchinnikov & Chukavina 1957	n/a	Stanyukovich, Kishkovsky	Dzharty-Gumbez
Puccinellia pamirica	China	NA	NA	NA	NA	NA	NA	39.006685	74.460239	3472	approximated based on the locality description	MSB; GBIF 615384534	1998-08-16	Wündisch U.	Muji; [Muji Vy. S; Kongur, MS/Xinjiang Uygur Zizhiqu; 1998; U.Wündisch]; voucher not verified by the athours
Puccinellia pamirica	Tajikistan	NA	NA	NA	NA	NA	NA	38.275735	73.681064	4138	approximated based on the locality description	LE 19052	1968-08-09	Ikonnikov C.	Western Pshart River Valley; [Западный Пшарт ниже Джар-джилга, 1968, Ikonnikov] below Jar Jilga river; the Western Pshart River is a tributary of the Murghab River; voucher verified by the authors
Puccinellia humilis	Tajikistan	NA	NA	NA	NA	A218	NA	37.522421	72.855501	4116	field record	KRA	2018-07-11	Nobis M., Klichowska E., Wróbel A., Nowak A.
Puccinellia tianschanica	Kyrgyzstan	NA	NA	NA	NA	1585	NA	40.786483	75.107422	3228	field record	KRA	2022-07-10	Nobis M., Klichowska E., Wróbel A.

## Sheet: References
Publications
Dickoré W.B. 1995. Systematiche Revision und chorologische Analyse der Monocotyledoneae des Karakorum (Zentralasien, West-Tibet). Flora Karakorumensis I. Angiospermae, Monocotyledoneae. Stapfia. 39:1–451.
Ovchinnikov P.N., Chukavina A.P. 1957. Puccinellia Parl. In: Ovchinnikov P.N., editor. Flora Tadzhikskoi SSR I [Flora of Tajikistan]. Moscow, Leningrad: Izdatelstvo Akademii Nauk SSSR. p. 223–232.
Podlech D., Anders O. 1977. Florula des Wakhan (Nordost-Afghanistan). Mitteilungen der Bot. Staatssammlung München. 13:361–502.
Stanyukovich K. 1949. Rostitielnyj pokrov Vostochnogo Pamira [Vegetation cover of the Eastern Pamir]. Zap. Imp. Rus. Geogr. Obs. New series.
Wu Y.H., Wang Q.J. 1999. The Grasses of Karakorum and Kunlun Mountains. Xining: Qinghai People’s Publishing House.
Web sites
GBIF; https://www.gbif.org/
Index Herbariorum; https://sweetgum.nybg.org/science/ih/ [to check herbarium acronym]
JACQ - Virtual Herbaria; https://www.jacq.org/
