# Supplementary material for: Hybrids as mirrors of the past: genomic footprints reveal spatio-temporal dynamics and extinction risk of alpine extremophytes in the mountains of Central Asia
Source: Front Plant Sci. 2024 Apr 17;15:1369732. doi: 10.3389/fpls.2024.1369732 (PMC11061500; doi:10.3389/fpls.2024.1369732)
Supplement: Supplementary Table 3 — Morphological dataset of the examined specimens of Puccinellia. [file Table_3.xlsx]

## Sheet: Morphology
Supplementary Table 3. Morphological features examined among selected reprentative specimens of Puccinellia. Variables labeled in green were used for the PCoA analysis shown in the main manuscript. At least 5 specimens were examined for the alpine taxa - in case less than 5 individuals were genotyped by the DArTseq. additional specimens from the herbarium materials were added; when the added spec…
			CULM	PANICLE					SPIKELET	LEMMA			PALEA		ANTHERS
DArTseq	Specimen	Species	Culm hight [cm]	Panicle length [cm]	Panicle width (in the widest part) [cm]	Panicle shape [0 - narrow; 1 - spreading]	Panicle branches [0- glabrous or sparsely scabrid; 1 - scabrid]	Panicle branches - angle between the lowest branch and panicle axis	Number of flowers in a spikelet (most frequent number in the middle of the panicle)	Lemma length [mm]	Lemma hairs [0=absent or a few hairs present only on a lemma callus; 1=multiple hairs on lemma callus and/or hairs present throughout the lower part of the lemma]	Lemma tip shape [0=acute. acuminate or subobtuse. strongly keeled at the top; 1= obtuse or truncate. not keeled or only weekly keeled at the top]	Prickles along palea keels in the upper 2/3 of palea length [0 is <=3; 1 is >3]	Prickles or hairs along palea keels in lower 1/3 of palea length [0 - absent; 1 - present]	Anthers length [mm]
			Variable_1	Variable_2	Variable_3	Variable_4	Variable_5	Variable_6	Variable_7	Variable_8	Variable_9	Variable_10	Variable_11	Variable_12	Variable_13
YES	1402_1	Puccinellia vachanica	31.1	5.5	0.7	1	0	5	3	1.9	0	1	1	0	0.8
YES	1408_3	Puccinellia vachanica	22.6	5.4	1.8	1	0	20	2	2.2	0	1	1	0	1.2
YES	1417_1	Puccinellia vachanica	24.6	5.5	0.5	0	0	10	3	2.2	0	0	1	0	1
YES	A134	Puccinellia pamirica	37	6.9	0.6	0	0	10	3	2.85	0	0	1	0	1.2
YES	A138	Puccinellia vachanica	37.2	7.6	0.8	0	0	5	2	2.5	0	0	1	0	1.2
YES	A150	Puccinellia vachanica	13.5	4.2	1.1	1	0	10	2	2.35	0	0	1	0	1.2
YES	A183	Puccinellia pamirica	17.4	5.5	0.6	0	0	5	3	3.1	0	0	1	0	1.2
YES	A194_1	Puccinellia pamirica	11.9	2.5	0.3	0	0	5	2	2.5	0	0	1	0	1
YES	A235	Puccinellia pamirica	19.6	6.9	0.7	0	0	5	3	3	0	0	1	0	1.3
YES	A237	Puccinellia pamirica	20.8	7.5	0.6	0	0	5	3	2.8	0	0	1	0	1.3
YES	A249	Puccinellia pamirica	16.5	5.1	0.4	0	0	5	3	3	0	0	1	0	1.35
YES	P042	Puccinellia himalaica	22.4	5.2	1.8	1	0	30	3	1.5	0	1	0	0	0.7
NO	P042_2	Puccinellia himalaica	16.6	7.8	2.6	1	0	15	2	1.5	0	1	0	0	0.6
NO	P042_3	Puccinellia himalaica	15	5.5	1.7	1	0	20	2	1.4	0	1	0	0	0.5
NO	P042_4	Puccinellia himalaica	17.4	6.1	1.8	1	0	15	3	1.5	0	1	0	0	0.5
NO	P042_5	Puccinellia himalaica	21.1	7.1	3.4	1	0	45	3	1.4	0	1	0	0	0.6
YES	P065	Puccinellia distans agg.	22.4	6.9	1.6	0	1	45	5	2	1	1	1	1	1
YES	A005	Puccinellia distans agg.	39.6	14	10.6	1	1	70	4	2.2	1	1	1	0	0.7
YES	A031	Puccinellia distans agg.	42.1	13.8	7.9	1	1	25	4	2.5	1	1	1	1	0.8
YES	1394_4	Puccinellia hackeliana	11.2	3.9	0.7	0	1	5	3	2.3	1	1	1	1	0.5
YES	1395_9	Puccinellia hackeliana	25	7.7	3.2	1	1	40	4	2.6	1	1	1	1	1
YES	1408_2	Puccinellia hackeliana	13.5	4.4	1.2	1	1	10	2	2	1	1	1	1	0.5
YES	A071	Puccinellia distans agg.	28.9	11.4	0.7	0	1	5	4	2.5	1	1	1	1	0.9
YES	1408_4	Puccinellia distans agg.	14.5	4.9	3.2	1	1	110	3	1.9	0	1	1	0	0.5
YES	A004	Puccinellia distans agg.	9.5	3.6	1.3	1	1	20	3	1.7	1	1	1	0	0.4
YES	A016	Puccinellia distans agg.	14	5.5	2.3	1	1	40	4	2	1	1	1	1	0.4
YES	1392_1	Puccinellia humilis	11.6	4.2	0.9	0	1	5	5	3	1	0	1	1	1.1
YES	A060	Puccinellia humilis	20.5	5.4	1	0	1	5	6	3.3	1	0	1	1	1.2
YES	A108	Puccinellia humilis	15.5	3.1	0.6	0	1	10	3	2.7	1	0	1	1	1
NO	A218	Puccinellia humilis	9.2	2.7	0.5	0	1	35	4	2.8	1	0	1	1	1
YES	A258	Puccinellia humilis	11.5	4	0.6	0	1	5	4	3.3	1	0	1	1	0.9
YES	1393_3	Puccinellia pauciramea	13.5	3	2.3	1	0	60	3	3.5	0	1	0	0	1
YES	A058	Puccinellia pauciramea	17.2	7.1	1.4	1	0	25	3	3	0	1	0	0	1
YES	A098	Puccinellia pauciramea	16.7	5.6	1.5	1	0	25	3	3	0	1	0	0	1
YES	A193	Puccinellia pauciramea	29.2	6.4	4.9	1	0	35	3	2.9	0	1	0	0	1
YES	A257	Puccinellia pauciramea	13	5.3	1.3	1	0	10	3	2.8	0	1	0	0	1.2
YES	P049	Puccinellia pauciramea	23.5	5.4	2.9	1	0	65	3	2.5	0	1	0	0	0.9
YES	P063	Puccinellia pauciramea	14.1	5.2	1.2	1	0	5	3	3	0	1	0	0	1
YES	P045	Puccinellia subspicata	12.4	3.4	1	0	0	15	3	3.8	0	0	1	0	2.3
YES	P046	Puccinellia subspicata	33.2	6.5	1.4	0	0	20	3	4	0	0	1	0	2
YES	P048	Puccinellia subspicata	14.7	5.8	1.5	0	0	20	6	4.7	0	0	1	0	2.1
NO	P051_1	Puccinellia subspicata	7.1	2.8	0.9	0	0	10	3	4.3	0	0	1	0	1.8
YES	P051	Puccinellia subspicata	7.8	3	0.7	0	0	5	3	4	0	0	1	0	1.6
YES	P036	Puccinellia tenuiflora	63.7	21.2	15.5	1	1	120	3	2	0	1	1	0	0.9
YES	P037	Puccinellia tenuiflora	60.2	16	7.5	1	1	35	3	1.6	0	1	1	0	1.1
YES	A011	Puccinellia tianschanica	20.2	6.9	1.8	1	0	10	3	1.8	0	1	0	0	1.4
YES	A018	Puccinellia tianschanica	18.5	3.7	1.4	1	0	10	2	1.9	0	1	0	0	1.3
YES	A020	Puccinellia tianschanica	17.9	6.7	2	1	0	30	3	2.2	0	1	0	0	1.1
YES	P059	Puccinellia tianschanica	32.5	9.1	8.5	1	0	40	3	2.2	0	1	1	0	1.2
NO	1585	Puccinellia tianschanica	17.6	3.4	1.4	1	0	10	3	2	0	1	0	0	1.2

## Sheet: Variable_Correlation
Supplementary Table 3.1. Pearson's correlation coefficient among the examined morphological variables. Values above 0.7 shown.
	Variable_1	Variable_2	Variable_3	Variable_4	Variable_5	Variable_6	Variable_7	Variable_8	Variable_9	Variable_10	Variable_11	Variable_12	Variable_13
Variable_1	1	0.889463384340261	0.747785624187684
Variable_2	0.889463384340261	1	0.841643640590065
Variable_3	0.747785624187684	0.841643640590065	1			0.714147321832784
Variable_4				1						0.836510568373783
Variable_5					1				0.868850942788413			0.78294514237923
Variable_6			0.714147321832784			1
Variable_7							1
Variable_8								1					0.75049750482682
Variable_9					0.868850942788413				1			0.901127113779166
Variable_10				0.836510568373783						1
Variable_11											1
Variable_12					0.78294514237923				0.901127113779166			1
Variable_13								0.75049750482682					1
