# Supplementary material for: Hybrids as mirrors of the past: genomic footprints reveal spatio-temporal dynamics and extinction risk of alpine extremophytes in the mountains of Central Asia
Source: Front Plant Sci. 2024 Apr 17;15:1369732. doi: 10.3389/fpls.2024.1369732 (PMC11061500; doi:10.3389/fpls.2024.1369732)
Supplement: Supplementary Table 4 — Summary of the number of genetic group recovered across replicates runs in fastSTRUCTURE and STRUCTURE analyses. [file Table_4.xlsx]

## Sheet: Arkusz1
fastStructure - 160 individuals												fastStructure - 159 individuals
K	Number of delimited groups after exclusion of ghost clusters											K	Number of delimited groups after exclusion of ghost clusters
	Seed 100	Seed 200	Seed 300	Seed 400	Seed 500	Seed 600	Seed 700	Seed 800	Seed 900	Seed 1000			Seed 100	Seed 1000
1	1	1	1	1	1	1	1	1	1	1		1	1	1
2	2	2	2	2	2	2	2	2	2	2		2	2	2
3	3	3	3	3	3	3	3	3	3	3		3	3	3
4	3	4	4	4	4	4	3	3	4	4		4	4	4
5	5	4	4	5	4	5	4	4	5	4		5	4	4
6	5	5	5	5	3	4	4	4	5	5		6	5	5
7	5	5	4	5	4	5	5	5	5	5		7	5	5
8	5	4	5	4	5	5	5	5	5	5		8	4	5
9	5	4	5	5	4	5	4	5	5	5		9	4	5
10	5	5	5	5	4	5	5	5	4	5		10	5	4
Model complexity that maximizes marginal likelihood	9	8	4	4	10	9	7	6	8	9		Model complexity that maximizes marginal likelihood	6	10
Model components used to explain structure in data	5	5	4	5	4	5	5	5	5	5		Model components used to explain structure in data	4	5
Number of delimited groups after exclusion of ghost clusters
K	Structure - 11 individuals
	MedMed	MedMean	MaxMed	MaxMean	Reps
1	1	1	1	1	10
2	2	2	2	2	10
3	3	3	3	3	10
4	4	4	4	4	10
5	5	5	5	5	10
6	5	5	6	6	10
7	5	5	6	6	10
8	6	6	7	7	10
9	6	6	7	7	10
10	6	6	7	7	10
11	6	6	7	7	10
